# Supplementary material
Source: HighWire-hosted journal article supplement (http://www.cmaj.ca/highwire/filestream/73705/field_highwire_adjunct_files/3/190124-res-3-at.pdf)
Supplement: 190124-res-3-at.pdf [file 190124-res-3-at.pdf]

**Appendix 3 (as submitted by the authors): Supplementary Table 2**  
**Hazard ratio (95% CI) of MACE according to fifths of lean body mass index**

| Fifths of lean body mass index | Hazard ratio(95%CI) |                   |                   |                   |
|--------------------------------|---------------------|-------------------|-------------------|-------------------|
|                                | Model 1             | Model 2           | Model 3           | Model 4           |
| 1                              | reference           | reference         | reference         | reference         |
| 2                              | 0.905(0.781–1.05)   | 0.921(0.794–1.07) | 0.926(0.814–1.06) | 0.871(0.743–1.02) |
| 3                              | 0.975(0.843–1.13)   | 1.00(0.844–1.17)  | 1.00(0.871–1.17)  | 0.903(0.755–1.08) |
| 4                              | 0.927(0.801–1.07)   | 0.980(0.995–1.14) | 1.00(0.863–1.17)  | 0.851(0.689–1.05) |
| 5                              | 1.02(0.881–1.17)    | 1.14(0.982–1.32)  | 1.16(0.993–1.35)  | 0.903(0.687–1.19) |
| P value for trend              | 0.747               | 0.077             | 0.068             | 0.378             |

Model 1: unadjusted; Model 2: adjusted age, race, sex; Model 3: adjusted for age, race, sex, treatment group, hypertension, hyperlipidemia, smoking, previous cardiovascular disease, previous heart failure, height, fasting blood glucose; model 4: model 3 in addition to fat body index
